# Supplementary material
Source: PubMed Central journal article supplement (PMC1383709)
Supplement: bj3940593add.pdf [file bj3940593add.pdf]

**A**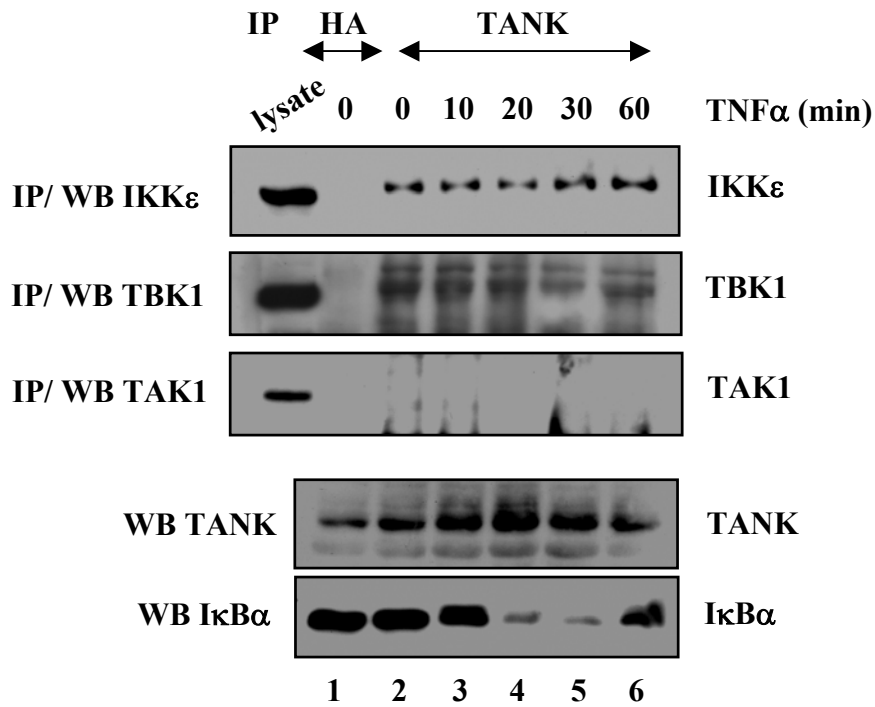**B**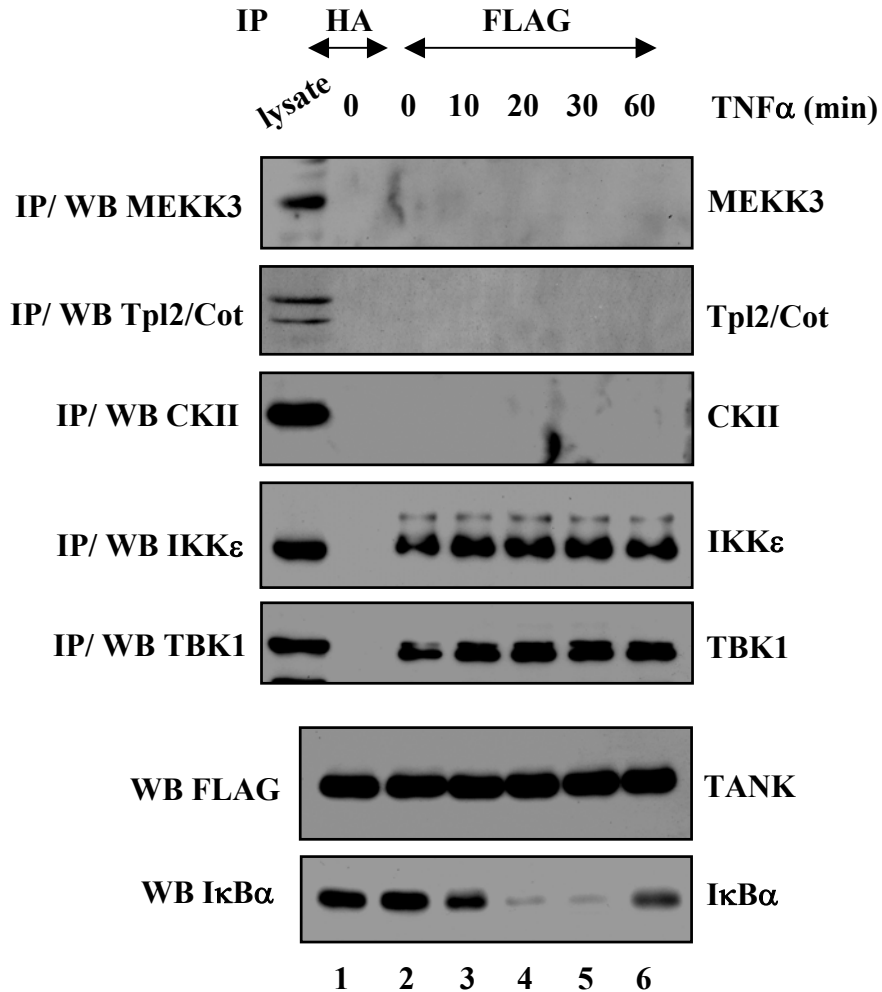*Figure S1*

**Figure S1: Identification of the TANK-interacting kinases.** (A) 293 cells were left untreated or stimulated with TNF $\alpha$  for the indicated periods of time. Cell extracts were subjected to anti-TANK immunoprecipitations followed by anti-IKK $\epsilon$ , -TBK1 or -TAK1 western analyses (lanes 2 to 6). Anti-HA immunoprecipitations were performed as negative control (lane 1). Cell extracts were subjected to anti-TANK western analyses (second panel from the bottom). Note that TNF $\alpha$ -mediated NF- $\kappa$ B activation was assessed by anti-I $\kappa$ B $\alpha$  western analyses showing the signal-induced degradation of this inhibitor (bottom panel, lanes 1 to 6). (B) Cell extracts from stably FLAG-TANK expressing 293 cells were subjected to anti-FLAG immunoprecipitations followed by anti-CKII, -MEKK3, -Tpl2/Cot and -IKK $\epsilon$  western analyses. Expression of these kinases in the cell lysates were checked by western analyses using the corresponding antibodies (“lysate”) whereas TANK expression was assessed by anti-FLAG western blots (bottom panels). TNF $\alpha$ -mediated NF- $\kappa$ B activation was assessed as in A.
